# Supplementary material for: Equilibrative nucleoside transporter 1 (ENT1) is critical for pollen germination and vegetative growth in Arabidopsis
Source: PubMed Central journal article supplement — J Exp Bot. 2011 Jun 3;62(13):4627–37. doi: 10.1093/jxb/err183 (PMC3170557; doi:10.1093/jxb/err183), 2011-06-03
Supplement: supp_err183_00058917_file001.pdf [file supp_err183_00058917_file001.pdf]

## Table S1

### Primers used in this study

#### Quantitative RT-PCR

At1g70330, AtENT1-f 5'-GCCGGAGAGGTATATGCAAG-3'  
and AtENT1-r 5'-TAACAACAATCCCCACAGCA-3'

At3g09990, AtENT2-f 5'-CGGAATAGACATATGTTAGCTCATG-3'  
and AtENT2-r 5'-GTAGTGTTGCCTATTGTTTGACCAG-3'

At4g05120, AtENT3-f 5'-GGTTACAAGCAAAGAATATGAAAGC-3'  
and AtENT3-r 5'-GGTCCGGAGCAGAATGCGTT-3'

At4g05130, AtENT4-f 5'-TAATTGCACAAAATCTCGAGAACTCAG-3'  
and AtENT4-r 5'-GGTCCGGAGCAGAATGCGTT-3'

At4g05140, AtENT5-f 5'-GAGGTGTCAGCACAGGAAAGACTT-3'  
and AtENT5-r 5'-GTTCTCATCAGCAATAGTTTCACA-3'

At4g05110, AtENT6-f 5'-TGGGACAAAAATAATGTCTG-3'  
and AtENT6-r 5'-GGTCCGGAGCAGAATGCGTT-3'

At1g61630, AtENT7-f 5'-TGGATGCTTTTCCTCACCTC-3'  
and AtENT7-r 5'-GCGAAGATCCCTCCCAATAG-3'

At1g02630, AtENT8-f 5'-GCATGTCTACGTGGACCAAA-3'  
and AtENT8-r 5'-TAAGGTCTAGATGAGCCAGAGCCAACC-3'

At1g07930 EF1 $\alpha$ -f 5'-GAGACCACCAAGTACTACTGCAC-3'  
and EF1 $\alpha$ -r 5'-GTTGGTCCCTTGTACCAGTCAAG-3'

Promoter-GUS constructs

ENT1, GUS1-f 5'- CTCTGCCATCCGGAAGCTTCTAGCAAAGCCG-3'

GUS1-r 5'- AGAAGTCTCCGCCCGGGCTTCCGAGTCAG-3'

*ENT1*-RNAi

TM 188 5`-GACCACCCTCGAGAAATCCGCCGG-3`

TM 189 5`-CATCGAATTCGGCGTATAATCCGACC-3`

TM 190 5`-GACCACCATCTAGAAATCCGCCGG-3`

TM 191 5`-CATCGGATCCGGCGTATAATCCGACC-3`

*35S:ENT1*

TM 342 5`-GAGAGAACTCGAGAAATTCAAATGACC-3`

TM 343 5`-GATAACAAAGCTTTTCTAGAATCAAATGACC-3`

LB3 5'-TAGCATCTGAATTTTCATAACCAATCTCGATACAC-3'

LB335 5'-ACTCAACCCTATCTCGGGCTATTC-3'

TM45 5'-GGGCGATTGGTATGCAACATT-3'

TM46 5'- GCGAAGATCCCTCCCAATAG-3'

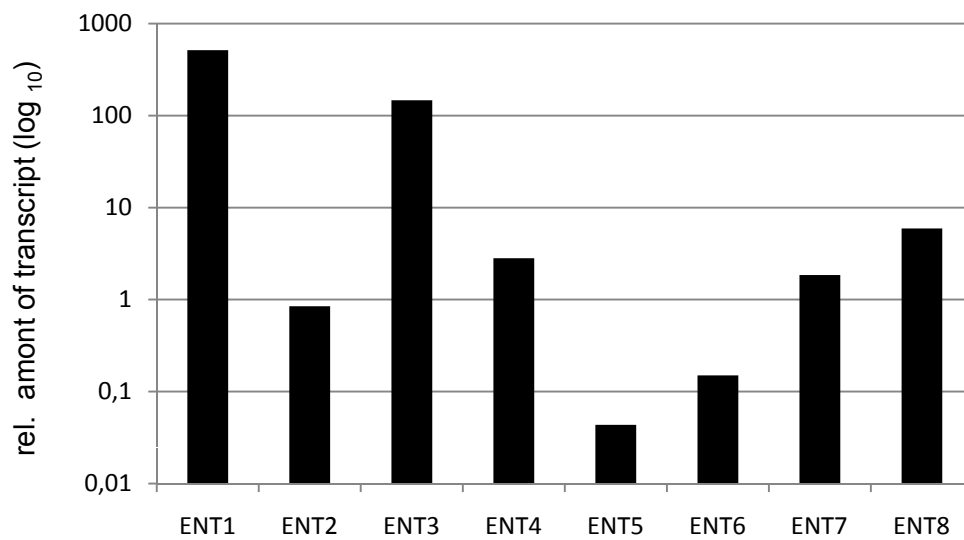

Fig. S1

Expression level of Arabidopsis equilibrative nucleoside transporter genes (*ENT*) in 10 days old, whole seedlings grown in liquid medium. The transcript levels of all eight *ENT* isoforms were determined by quantitative RT-PCR using gene specific primers. Transcript levels are calculated relative to the housekeeping gene “elongation factor 1 $\alpha$  (EF1 $\alpha$ )”. Data are the mean of four independent experiments. Standard errors are below 10%.

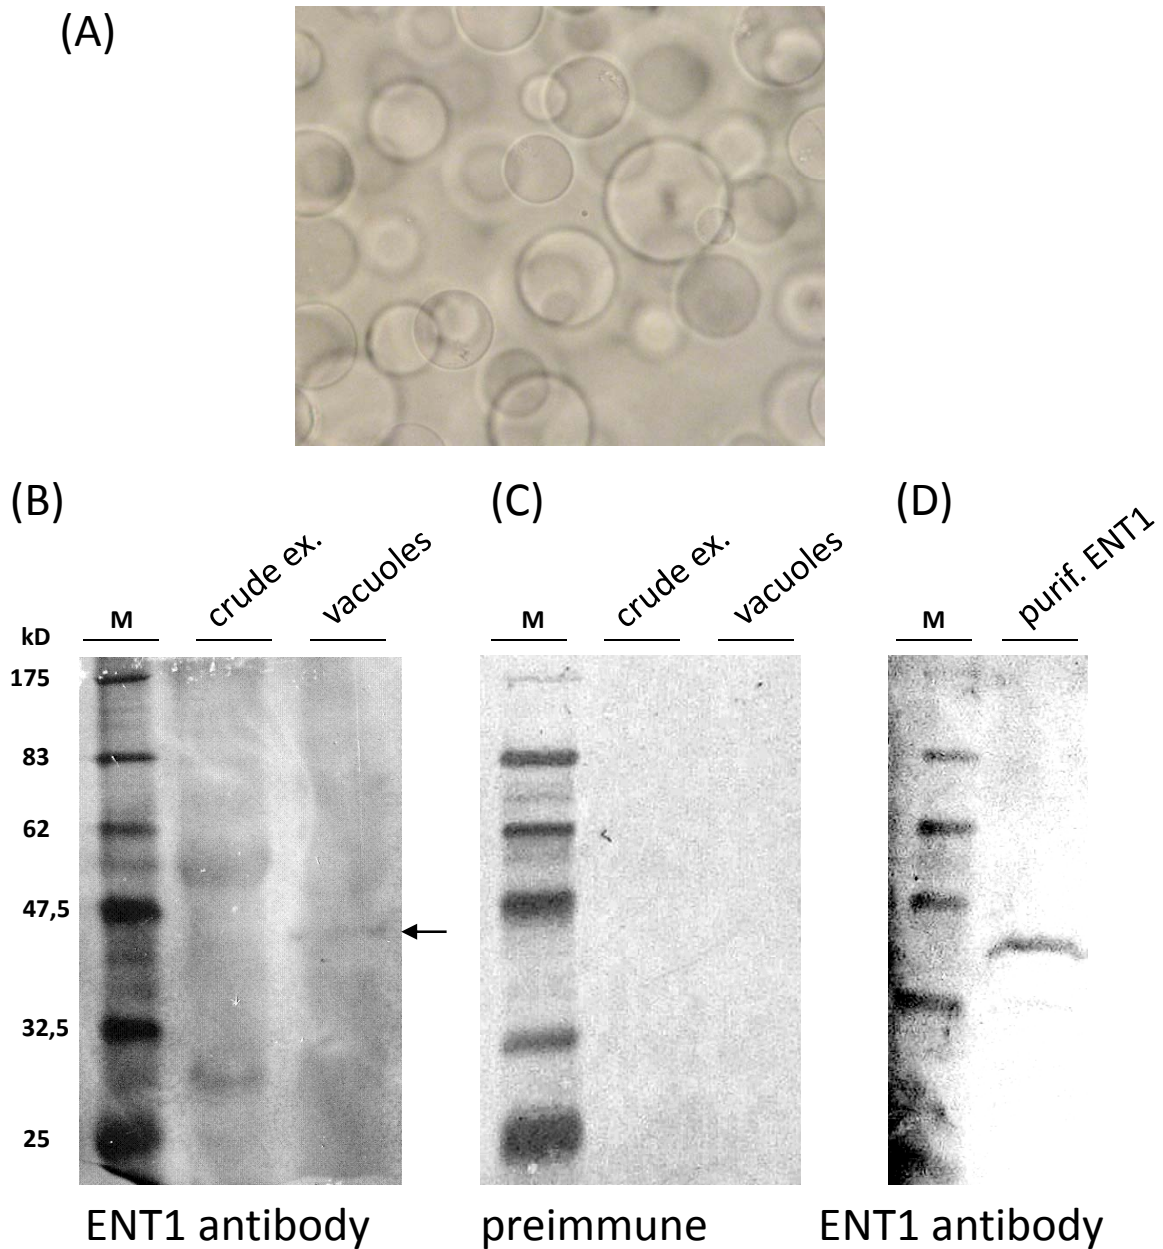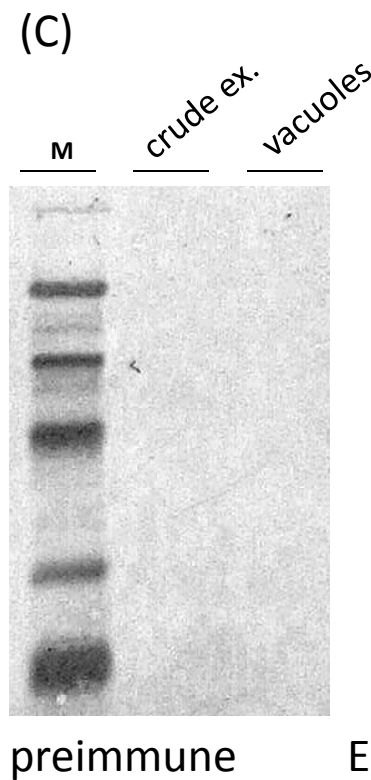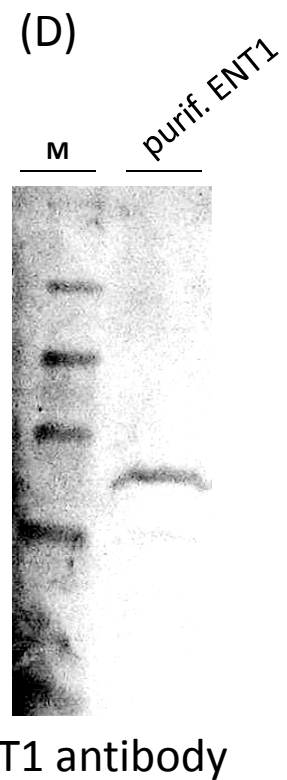

Fig. S2

Light micrographic image of isolated vacuoles from Arabidopsis and immunodetection of ENT1 in these vacuolar preparations. (A) Light micrographic image of isolated vacuoles at 400-fold magnification (B) Arabidopsis crude extract and vacuolar preparation, probed with ENT1-specific polyclonal antiserum. Arrow indicates recognition of a band at appr. 49 kDa. C, pre immune control to B; (D) Detection of ENT1 in expressed in *E. coli* and after affinity purification with the ENT1-specific polyclonal antiserum used in B.
